# Supplementary material
Source: PubMed Central journal article supplement (PMC6276788)
Supplement: NIHMS968097-supplement-2.pdf [file NIHMS968097-supplement-2.pdf]

**Table 1A. Sensitivity analyses of smoking susceptibility among never smokers and individual index variables, analyzed separately and together, and with the index as a continuous variable**

|                                           |                   | bivariate |      |      | Adj 1 (brand recall) |      |      | Adj 2 (PoS) |      |       | Adj 3 (all marketing indicators) |      |       | Adj 4 (index continuous) |      |     |
|-------------------------------------------|-------------------|-----------|------|------|----------------------|------|------|-------------|------|-------|----------------------------------|------|-------|--------------------------|------|-----|
|                                           |                   | OR        | SE   | p    | AOR                  | SE   | p    | AOR         | SE   | p     | AOR                              | SE   | p     | AOR                      | SE   | p   |
| <b>PoS exposure (tienda-quartiles)</b>    | <i>ref</i>        |           |      |      |                      |      |      |             |      |       |                                  |      |       |                          |      |     |
|                                           | 1                 | 1.16      | 0.16 | 0.28 | N/A                  | N/A  | N/A  | 1.27        | 0.24 | 0.22  | 1.21                             | 0.23 | 0.31  | N/A                      | N/A  | N/A |
|                                           | 2                 | 1.98      | 0.23 | 0    | N/A                  | N/A  | N/A  | 1.66        | 0.24 | 0.001 | 1.59                             | 0.26 | 0.004 | N/A                      | N/A  | N/A |
|                                           | 3                 | 2.29      | 0.3  | 0    | N/A                  | N/A  | N/A  | 1.96        | 0.23 | 0     | 1.87                             | 0.25 | 0     | N/A                      | N/A  | N/A |
| <b>brand recall</b>                       | <i>None</i>       |           |      |      |                      |      |      |             |      |       |                                  |      |       |                          |      |     |
|                                           | 1                 | 1.1       | 0.13 | 0.41 | 1.02                 | 0.15 | 0.9  | N/A         | N/A  | N/A   | 0.98                             | 0.13 | 0.89  | N/A                      | N/A  | N/A |
|                                           | 2                 | 1.33      | 0.21 | 0.07 | 1.1                  | 0.18 | 0.58 | N/A         | N/A  | N/A   | 1.03                             | 0.18 | 0.85  | N/A                      | N/A  | N/A |
|                                           | 3                 | 1.54      | 0.35 | 0.06 | 1.31                 | 0.31 | 0.25 | N/A         | N/A  | N/A   | 1.23                             | 0.31 | 0.41  | N/A                      | N/A  | N/A |
| <b>Own branded merchandise</b>            | <i>yes (v no)</i> | 3.00      | 0.46 | 0    | N/A                  | N/A  | N/A  | N/A         | N/A  | N/A   | 1.87                             | 0.4  | 0.003 | N/A                      | N/A  | N/A |
| <b>Marketing receptivity (Continuous)</b> |                   | 1.56      | 0.06 | 0    | N/A                  | N/A  | N/A  | N/A         | N/A  | N/A   | N/A                              | N/A  | N/A   | 1.35                     | 0.06 | 0   |

\*all adjusted models include the following variables: sex, age, parental education, parent smoking, sibling smoking, friend smoking, sensation seeking.

**Table 2A. Sensitivity analyses of willingness to try branded tobacco among never smokers and individual index variables, analyzed separately and together, and with the index as a continuous variable**

|                                           |                   | bivariate |      |      | Adj 1 (brand recall) |      |     | Adj 2 (PoS) |      |       | Adj 3 (all marketing indicators) |      |       | Adj 4 (index continuous) |      |      |
|-------------------------------------------|-------------------|-----------|------|------|----------------------|------|-----|-------------|------|-------|----------------------------------|------|-------|--------------------------|------|------|
|                                           |                   | OR        | SE   | p    | AOR                  | SE   | p   | AOR         | SE   | p     | AOR                              | SE   | p     | AOR                      | SE   | p    |
| <b>PoS exposure (tienda-quartiles)</b>    | <i>ref</i>        |           |      |      | N/A                  | N/A  | N/A |             |      |       |                                  |      |       |                          |      |      |
|                                           | 1                 | 1.16      | 0.16 | 0.28 | N/A                  | N/A  | N/A | 1.14        | 0.2  | 0.45  | 1.12                             | 0.19 | 0.5   | N/A                      | N/A  | N/A  |
|                                           | 2                 | 1.43      | 0.14 | 0    | N/A                  | N/A  | N/A | 1.38        | 0.16 | 0.01  | 1.35                             | 0.15 | 0.01  | N/A                      | N/A  | N/A  |
|                                           | 3                 | 1.56      | 0.21 | 0    | N/A                  | N/A  | N/A | 1.51        | 0.22 | 0.004 | 1.35                             | 0.19 | 0.03  | N/A                      | N/A  | N/A  |
| <b>brand recall</b>                       | <i>None</i>       |           |      |      |                      |      |     | N/A         | N/A  | N/A   |                                  |      |       |                          |      |      |
|                                           | 1                 | 1.8       | 0.16 | 0    | 1.96                 | 0.22 | 0   | N/A         | N/A  | N/A   | 2.03                             | 0.23 | 0     | N/A                      | N/A  | N/A  |
|                                           | 2                 | 2.36      | 0.33 | 0    | 2.22                 | 0.33 | 0   | N/A         | N/A  | N/A   | 2.22                             | 0.34 | 0     | N/A                      | N/A  | N/A  |
|                                           | 3                 | 2.59      | 0.52 | 0    | 2.74                 | 0.56 | 0   | N/A         | N/A  | N/A   | 2.74                             | 0.52 | 0     | N/A                      | N/A  | N/A  |
| <b>Own branded merchandise</b>            | <i>yes (v no)</i> | 2.09      | 0.43 | 0    | N/A                  | N/A  | N/A | N/A         | N/A  | N/A   | 1.63                             | 0.27 | 0.003 | N/A                      | N/A  | N/A  |
| <b>Marketing receptivity (Continuous)</b> |                   |           | 1.78 | 0.09 | 0                    | N/A  | N/A | N/A         | N/A  | N/A   | N/A                              | N/A  | N/A   | N/A                      | 1.49 | 0.08 |

\*all adjusted models include the following variables: sex, age, parental education, parent smoking, sibling smoking, friend smoking, sensation seeking.

**Table 3A. Sensitivity analyses of current smoking and individual index variables, analyzed separately and together, and with the index as a continuous variable**

|                                           |                   | bivariate |      |      | Adj 1 (brand recall) |      |       | Adj 2 (PoS) |      |       | Adj 3 (all marketing indicators) |      |       | Adj 4 (index continuous) |      |      |
|-------------------------------------------|-------------------|-----------|------|------|----------------------|------|-------|-------------|------|-------|----------------------------------|------|-------|--------------------------|------|------|
|                                           |                   | OR        | SE   | p    | AOR                  | SE   | p     | AOR         | SE   | p     | AOR                              | SE   | p     | AOR                      | SE   | p    |
| <b>PoS exposure (tienda-quartiles)</b>    | <i>ref</i>        |           |      |      | N/A                  | N/A  | N/A   |             |      |       |                                  |      |       |                          |      |      |
|                                           | 1                 | 1.64      | 0.35 | 0.02 | N/A                  | N/A  | N/A   | 2.67        | 0.83 | 0.002 | 2.66                             | 0.83 | 0.002 | N/A                      | N/A  | N/A  |
|                                           | 2                 | 2.72      | 0.42 | 0    | N/A                  | N/A  | N/A   | 2.73        | 0.47 | 0     | 2.64                             | 0.47 | 0     | N/A                      | N/A  | N/A  |
|                                           | 3                 | 3.2       | 0.58 | 0    | N/A                  | N/A  | N/A   | 3.09        | 0.82 | 0     | 2.71                             | 0.77 | 0     | N/A                      | N/A  | N/A  |
| <b>brand recall</b>                       | <i>None</i>       |           |      |      |                      |      |       | N/A         | N/A  | N/A   |                                  |      |       |                          |      |      |
|                                           | 1                 | 1.47      | 0.24 | 0.02 | 1.42                 | 0.33 | 0.14  | N/A         | N/A  | N/A   | 1.38                             | 0.33 | 0.18  | N/A                      | N/A  | N/A  |
|                                           | 2                 | 2.79      | 0.46 | 0    | 1.49                 | 0.29 | 0.04  | N/A         | N/A  | N/A   | 1.56                             | 0.32 | 0.03  | N/A                      | N/A  | N/A  |
|                                           | 3                 | 3.89      | 0.81 | 0    | 2.34                 | 0.67 | 0.003 | N/A         | N/A  | N/A   | 2.32                             | 0.7  | 0.005 | N/A                      | N/A  | N/A  |
| <b>Own branded merchandise</b>            | <i>yes (v no)</i> | 3.47      | 0.6  | 0    | N/A                  | N/A  | N/A   | N/A         | N/A  | N/A   | 1.51                             | 0.31 | 0.04  | N/A                      | N/A  | N/A  |
| <b>Marketing receptivity (Continuous)</b> |                   | 2.02      | 0.13 | 0    | N/A                  | N/A  | N/A   | N/A         | N/A  | N/A   | N/A                              | N/A  | N/A   | 1.48                     | 0.12 | 0.00 |

\*all adjusted models include the following variables: sex, age, parental education, parent smoking, sibling smoking, friend smoking, sensation seeking.

**Table 4A. Sensitivity analyses of positive expectancies amongst never smokers and individual index variables, analyzed separately and together, and with the index as a continuous variable**

|                                           |                   | bivariate |      |       | Adj 1 (brand recall) |      |      | Adj 2 (PoS) |      |      | Adj 3 (all marketing indicators) |      |      | Adj 4 (index continuous) |     |      |
|-------------------------------------------|-------------------|-----------|------|-------|----------------------|------|------|-------------|------|------|----------------------------------|------|------|--------------------------|-----|------|
|                                           |                   | OR        | SE   | p     | AOR                  | SE   | p    | AOR         | SE   | p    | AOR                              | SE   | p    | AOR                      | SE  | p    |
| <b>PoS exposure (tienda-quartiles)</b>    | <i>ref</i>        |           |      |       |                      |      |      |             |      |      |                                  |      |      |                          |     |      |
|                                           | 1                 | 0.07      | 0.06 | 0.24  | N/A                  | N/A  | N/A  | 0.09        | 0.07 | 0.21 | 0.08                             | 0.07 | 0.22 | N/A                      | N/A | N/A  |
|                                           | 2                 | 0.15      | 0.05 | 0.01  | N/A                  | N/A  | N/A  | 0.08        | 0.06 | 0.18 | 0.07                             | 0.06 | 0.28 | N/A                      | N/A | N/A  |
|                                           | 3                 | 0.24      | 0.06 | 0     | N/A                  | N/A  | N/A  | 0.13        | 0.06 | 0.06 | 0.11                             | 0.07 | 0.14 | N/A                      | N/A | N/A  |
| <b>brand recall</b>                       | <i>None</i>       |           |      |       |                      |      |      |             |      |      |                                  |      |      |                          |     |      |
|                                           | 1                 | 0.1       | 0.06 | 0.19  | 0.06                 | 0.07 | 0.35 | N/A         | N/A  | N/A  | 0.06                             | 0.07 | 0.34 | N/A                      | N/A | N/A  |
|                                           | 2                 | 0.28      | 0.08 | 0.001 | 0.13                 | 0.07 | 0.05 | N/A         | N/A  | N/A  | 0.12                             | 0.07 | 0.1  | N/A                      | N/A | N/A  |
|                                           | 3                 | 0.34      | 0.07 | 0     | 0.23                 | 0.09 | 0.02 | N/A         | N/A  | N/A  | 0.2                              | 0.09 | 0.03 | N/A                      | N/A | N/A  |
| <b>Own branded merchandise</b>            | <i>yes (v no)</i> | 0.41      | 0.07 | 0     | N/A                  | N/A  | N/A  | N/A         | N/A  | N/A  | 0.26                             | 0.11 | 0.03 | N/A                      | N/A | N/A  |
| <b>Marketing receptivity (Continuous)</b> |                   | 2.02      | 0.18 | 0.02  | 0                    | N/A  | N/A  | N/A         | N/A  | N/A  | N/A                              | N/A  | N/A  | N/A                      | 0.1 | 0.02 |

\*all adjusted models include the following variables: sex, age, parental education, parent smoking, sibling smoking, friend smoking, sensation seeking.

**Table 5A. Sensitivity analyses of positive expectancies amongst current smokers and individual index variables, analyzed separately and together, and with the index as a continuous variable**

|                                           |                   | bivariate |      |      | Adj 1 (brand recall) |      |      | Adj 2 (PoS) |      |      | Adj 3 (all marketing indicators) |      |      | Adj 4 (index continuous) |      |      |
|-------------------------------------------|-------------------|-----------|------|------|----------------------|------|------|-------------|------|------|----------------------------------|------|------|--------------------------|------|------|
|                                           |                   | OR        | SE   | p    | AOR                  | SE   | p    | AOR         | SE   | p    | AOR                              | SE   | p    | AOR                      | SE   | p    |
| <b>PoS exposure (tienda-quartiles)</b>    | <i>ref</i>        |           |      |      | N/A                  | N/A  | N/A  |             |      |      |                                  |      |      |                          |      |      |
|                                           | 1                 | 0.04      | 0.24 | 0.87 | N/A                  | N/A  | N/A  | -0.13       | 0.2  | 0.54 | -0.1                             | 0.24 | 0.68 | N/A                      | N/A  | N/A  |
|                                           | 2                 | 0.24      | 0.18 | 0.19 | N/A                  | N/A  | N/A  | 0.06        | 0.19 | 0.76 | 0.07                             | 0.24 | 0.77 | N/A                      | N/A  | N/A  |
|                                           | 3                 | -0.04     | 0.18 | 0.81 | N/A                  | N/A  | N/A  | -0.27       | 0.18 | 0.14 | -0.25                            | 0.22 | 0.27 | N/A                      | N/A  | N/A  |
| <b>brand recall</b>                       | <i>None</i>       |           |      |      |                      |      |      | N/A         | N/A  | N/A  |                                  |      |      |                          |      |      |
|                                           | 1                 | -0.15     | 0.15 | 0.3  | -0.07                | 0.16 | 0.64 | N/A         | N/A  | N/A  | -0.05                            | 0.16 | 0.78 | N/A                      | N/A  | N/A  |
|                                           | 2                 | 0.06      | 0.19 | 0.76 | 0.09                 | 0.2  | 0.62 | N/A         | N/A  | N/A  | 0.08                             | 0.19 | 0.69 | N/A                      | N/A  | N/A  |
|                                           | 3                 | -0.08     | 0.15 | 0.61 | -0.22                | 0.14 | 0.14 | N/A         | N/A  | N/A  | -0.16                            | 0.14 | 0.28 | N/A                      | N/A  | N/A  |
| <b>Own branded merchandise</b>            | <i>yes (v no)</i> | 0.3       | 0.1  | 0.01 | N/A                  | N/A  | N/A  | N/A         | N/A  | N/A  | 0.09                             | 0.13 | 0.49 | N/A                      | N/A  | N/A  |
| <b>Marketing receptivity (Continuous)</b> |                   | 2.02      | 0.12 | 0.06 | 0.05                 | N/A  | N/A  | N/A         | N/A  | N/A  | N/A                              | N/A  | N/A  | N/A                      | 0.04 | 0.06 |

\*all adjusted models include the following variables: sex, age, parental education, parent smoking, sibling smoking, friend smoking, sensation seeking.
